# Supplementary material
Source: Springer Nature journal article supplement (https://www.springermedizin.de/resource/supplementary/12950_2009_126_MOESM4_ESM.pdf/9558138)

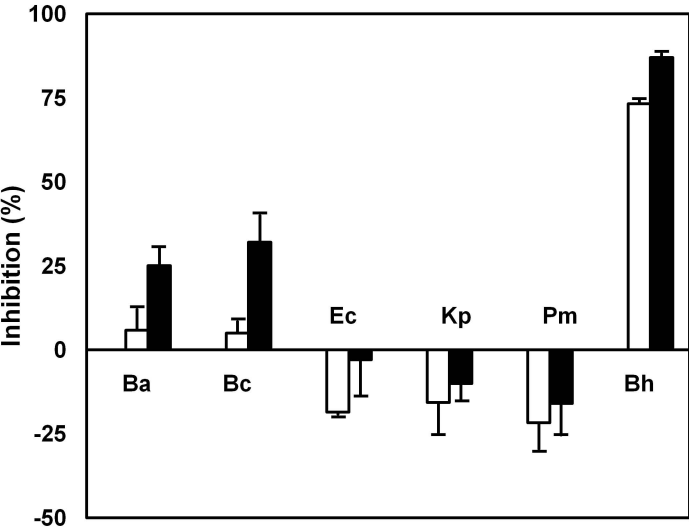

Supplement: MOESM4 [file 9558138]
